# Supplementary material for: Increasing Brain Permeability of PHA-767491, a Cell Division Cycle 7 Kinase Inhibitor, with Biodegradable Polymeric Nanoparticles
Source: MDPI journal article supplement (doi:10.3390/pharmaceutics13020180), 2021-01-28
Supplement: s1 [file s1]

# Supplementary Materials: Increasing Brain Permeability of PHA-767491, a Cell Division Cycle 7 kinase Inhibitor, with Biodegradable Polymeric Nanoparticles

Elisa Rojas-Prats, Carlota Tosat-Bitrián, Loreto Martínez-González, Vanesa Nozal, Daniel I. Pérez and Ana Martínez

**Table 1.** PAMPA-BBB assay permeability (reported and experimental) of ten commercial drugs used as controls and experimental permeability of PHA with its predictive penetration into the CNS. a) Reference [1]. b) Data represent the mean  $\pm$  SD of 2 independent experiments. c) Experimental prediction of BBB permeation by passive diffusion: CNS+: high BBB permeability, CNS-: low BBB permeability, CNS+/ CNS -: intermediate BBB permeability.

| Compound       | Bibl. <sup>a</sup> | $Pe$ ( $10^{-6}$ cm s <sup>-1</sup> ) <sup>b</sup> | Prediction <sup>c</sup> |
|----------------|--------------------|----------------------------------------------------|-------------------------|
| Atenolol       | 0.8                | $0.3 \pm 0.2$                                      | CNS -                   |
| Caffeine       | 1.3                | $0.7 \pm 0.0$                                      | CNS -                   |
| Desipramine    | 12.0               | $11.1 \pm 0.8$                                     | CNS +                   |
| Enoxacin       | 0.9                | $0.3 \pm 0.2$                                      | CNS -                   |
| Hydrocortisone | 1.9                | $2.0 \pm 0.3$                                      | CNS +/ CNS -            |
| Ofloxacin      | 0.8                | $0.2 \pm 0.1$                                      | CNS -                   |
| Piroxicam      | 2.5                | $0.8 \pm 0.1$                                      | CNS +/ CNS -            |
| Promazine      | 8.8                | $10.0 \pm 1.4$                                     | CNS +                   |
| Testosterone   | 17.0               | $14.4 \pm 2.6$                                     | CNS +                   |
| Verapamil      | 16.0               | $13.2 \pm 2.4$                                     | CNS +                   |
| PHA            |                    | $1.9 \pm 0.1$                                      | CNS -                   |

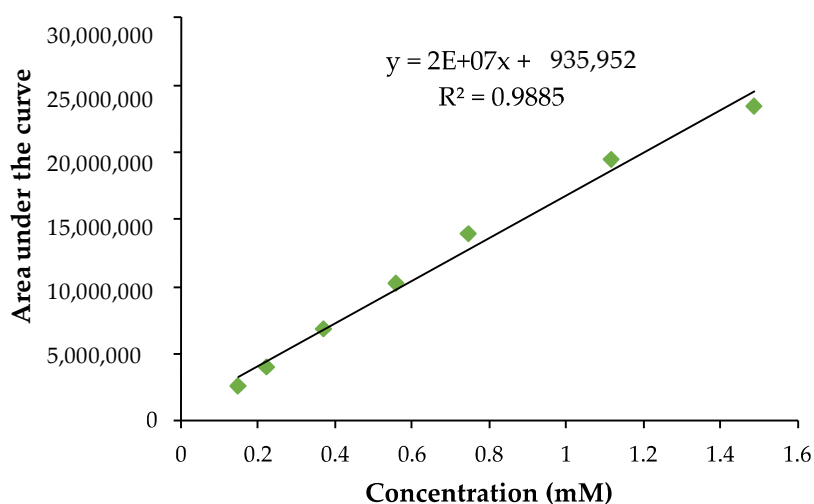

**Figure S1.** HPLC analysis. Linear correlation between the area under the curve and the concentration of free PHA.

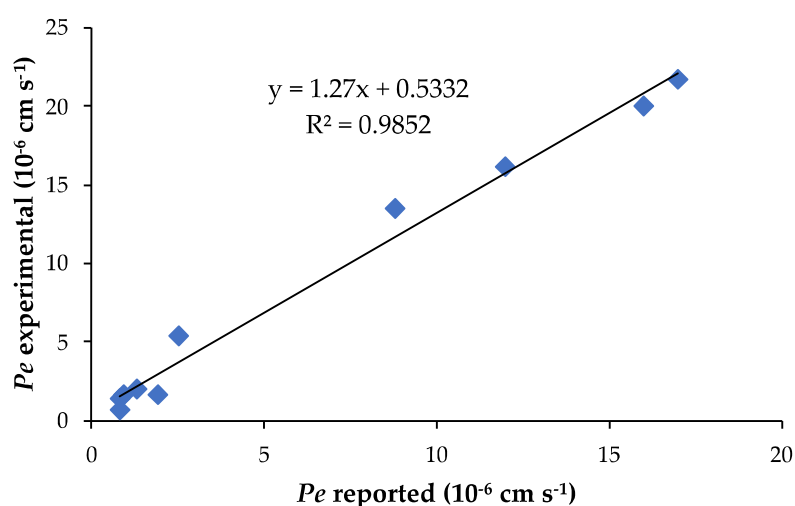

**Figure S2.** PAMPA-BBB assay. Linear correlation between experimental and reported permeability of ten commercial drugs used for the experiment validation.

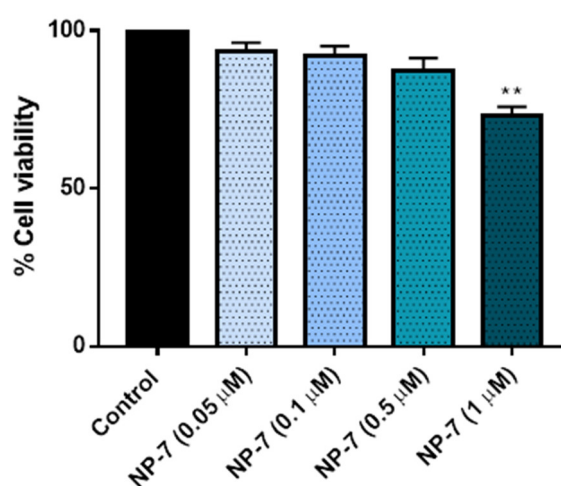

**Figure S3.** Cell viability of SH-SY5Y in the presence of NP-7 at 0.05, 0.1, 0.5 and 1  $\mu\text{M}$  of encapsulated PHA. Cell viability was measured 24 h after treatment by MTT assay. Data represent the mean  $\pm$  SEM of 3 different experiments. (\*\* $p < 0.01$  significantly different from control).

## References

1. Di, L.; Kerns, E. H.; Fan, K.; McConnell, O. J.; Carter, G. T., High throughput artificial membrane permeability assay for blood-brain barrier. *Eur. J. Med. Chem.* **2003**, *38* (3), 223–232.
